# Supplementary figures and images for: PERK reprograms hematopoietic progenitor cells to direct tumor-promoting myelopoiesis in the spleen
Source: PubMed Central journal article supplement — J Exp Med. 2022 Mar 10;219(4):e20211498. doi: 10.1084/jem.20211498 (PMC8919616; doi:10.1084/jem.20211498), 2022-03-10

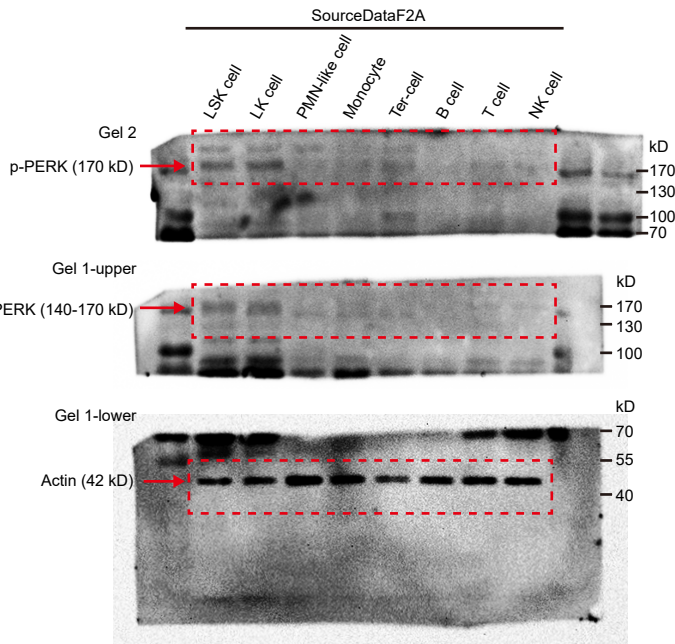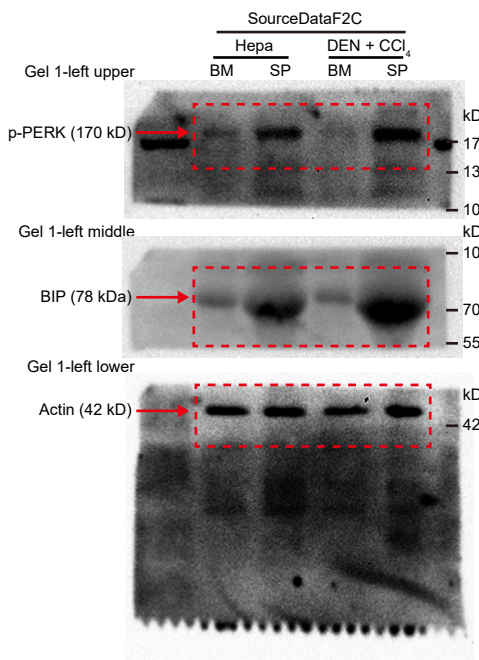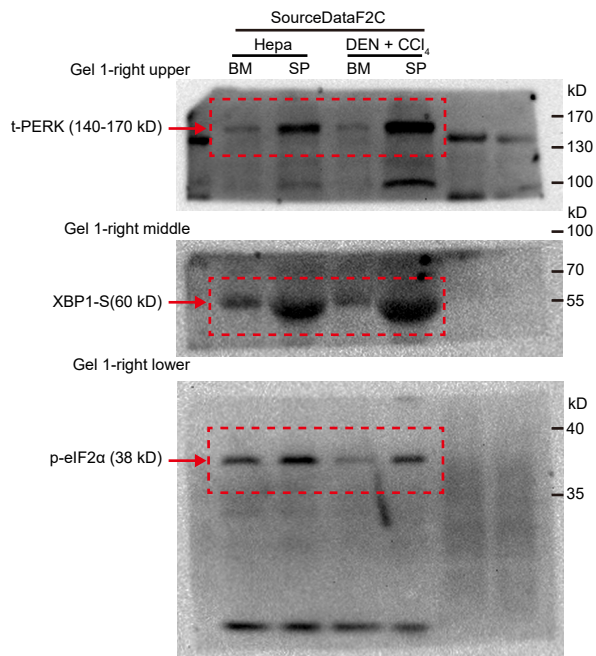

Supplement: JEM_20211498_SourceDataF2.pdf [file JEM_20211498_SourceDataF2.pdf]

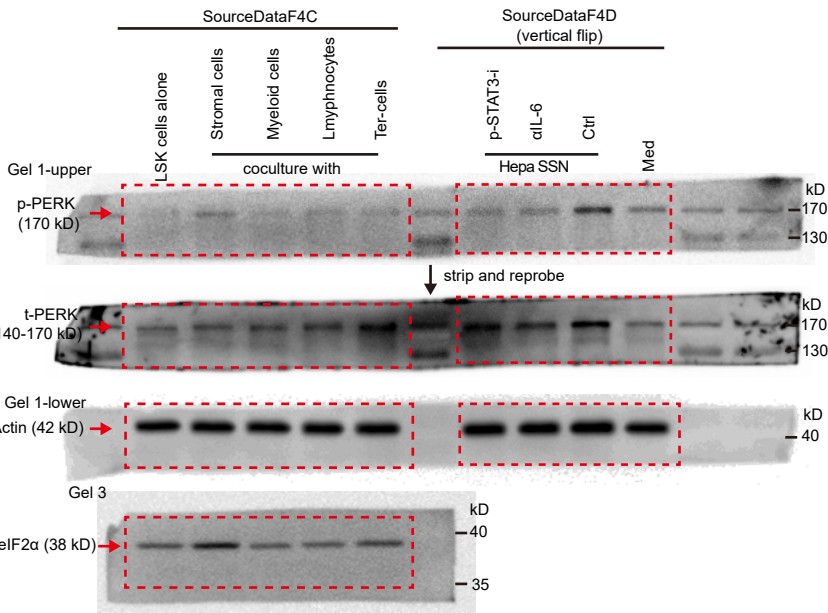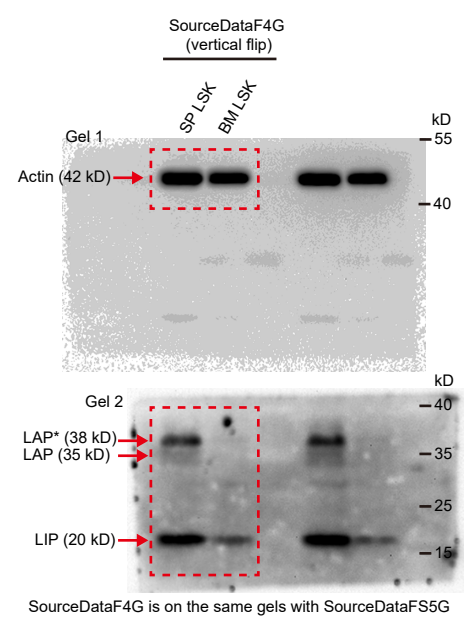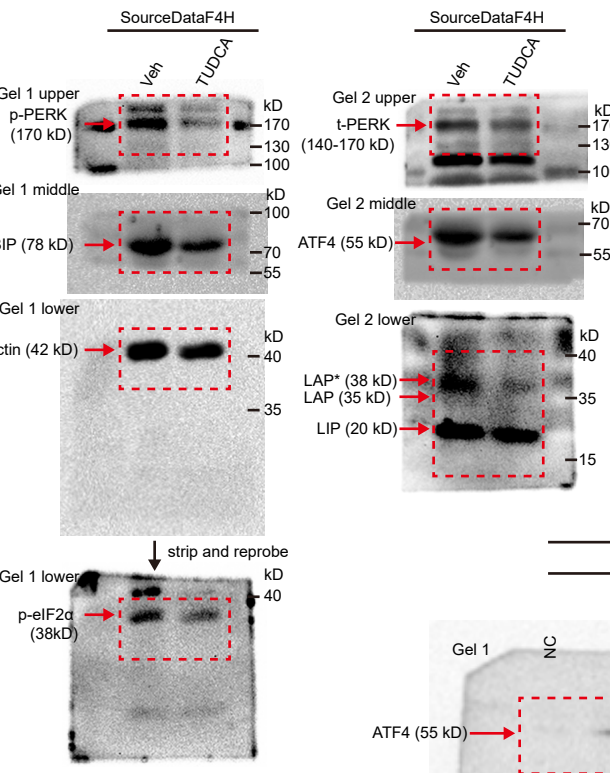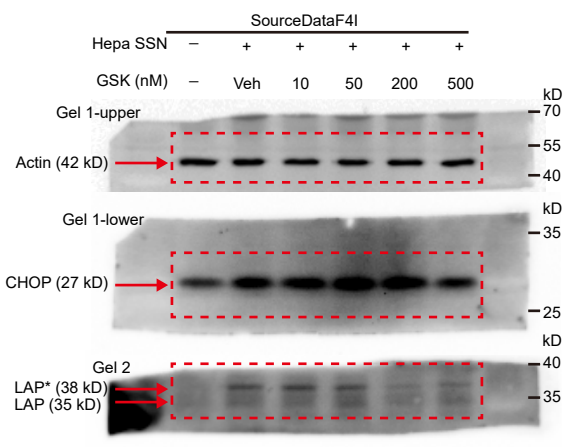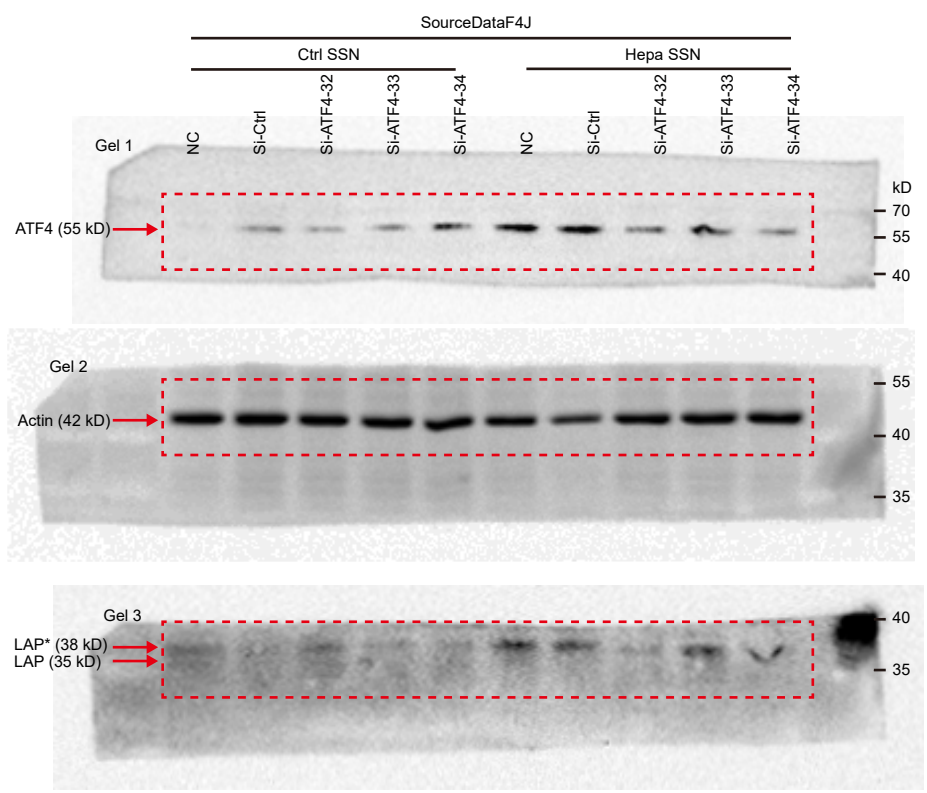

Supplement: JEM_20211498_SourceDataF4.pdf [file JEM_20211498_SourceDataF4.pdf]

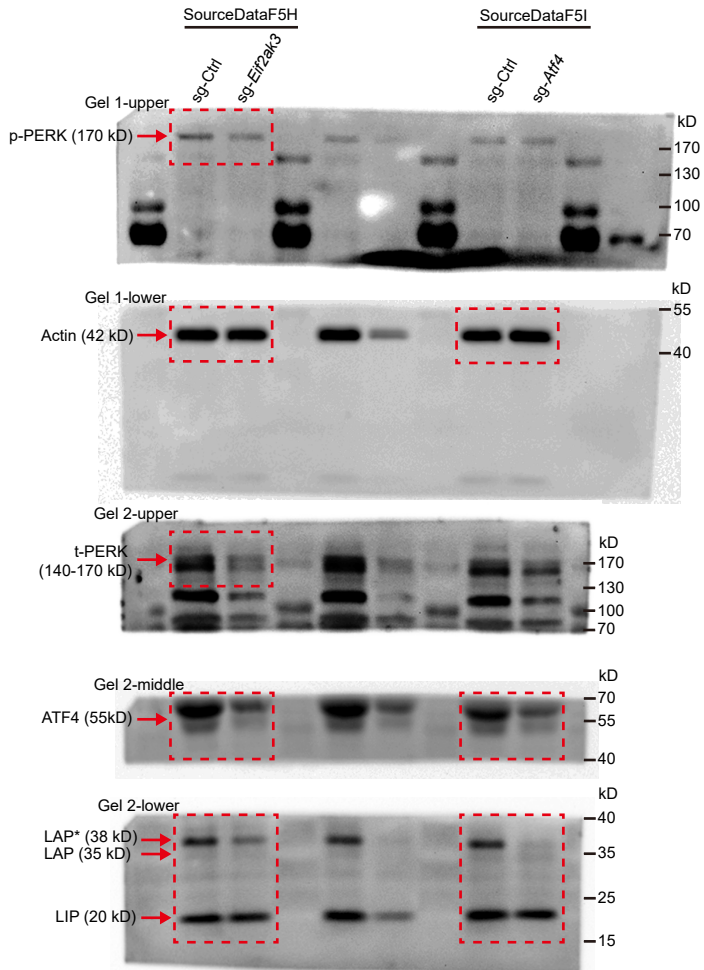

Supplement: JEM_20211498_SourceDataF5.pdf [file JEM_20211498_SourceDataF5.pdf]

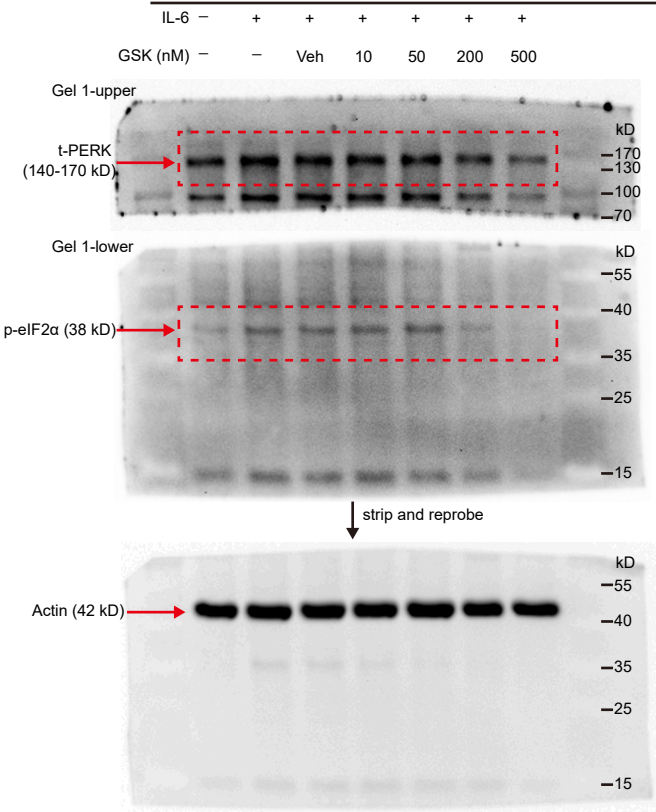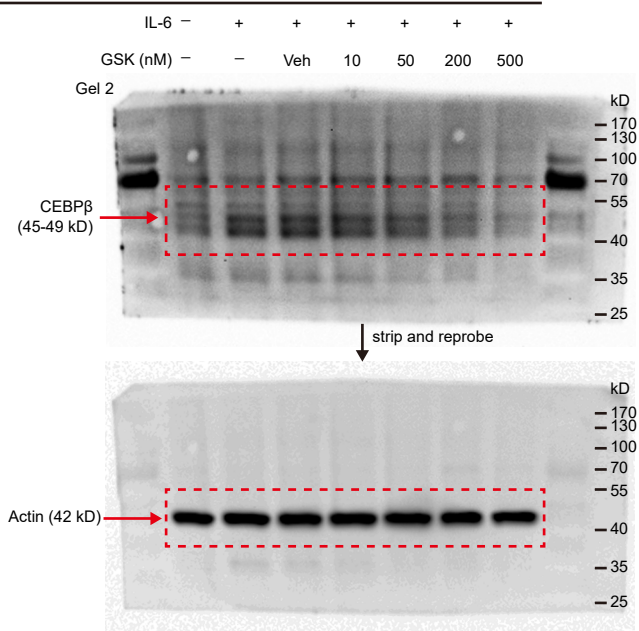

Supplement: JEM_20211498_SourceDataF7.pdf [file JEM_20211498_SourceDataF7.pdf]

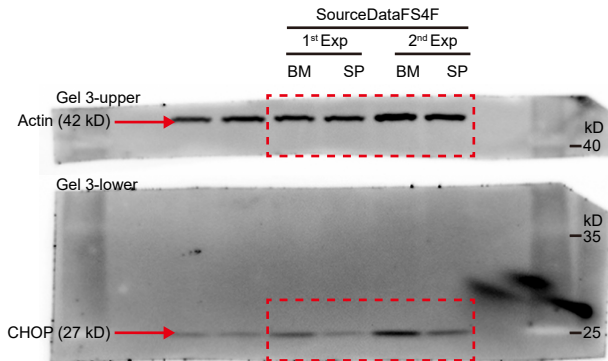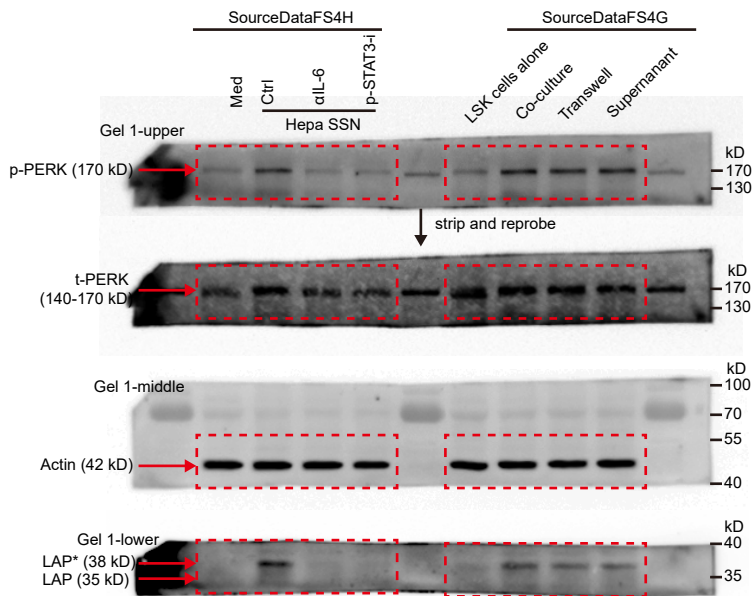

Supplement: JEM_20211498_SourceDataFS4.pdf [file JEM_20211498_SourceDataFS4.pdf]

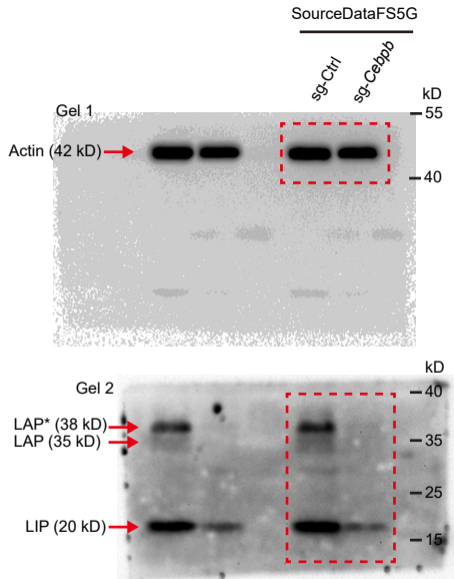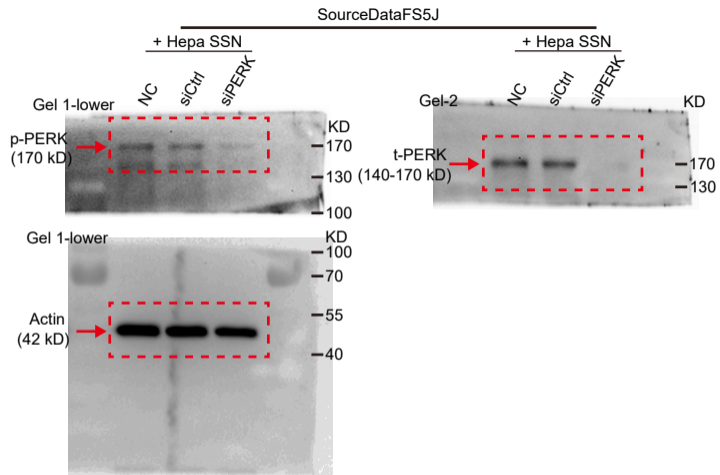

SourceDataFS5G is on the same gels with SourceDataF4G

Supplement: JEM_20211498_SourceDataFS5.pdf [file JEM_20211498_SourceDataFS5.pdf]
